# Supplementary material
Source: Springer Nature journal article supplement (https://www.springermedizin.de/resource/supplementary/13063_2010_534_MOESM2_ESM.pdf/9618180)

**First  
appointment:  
informa-  
tion  
and  
decision**

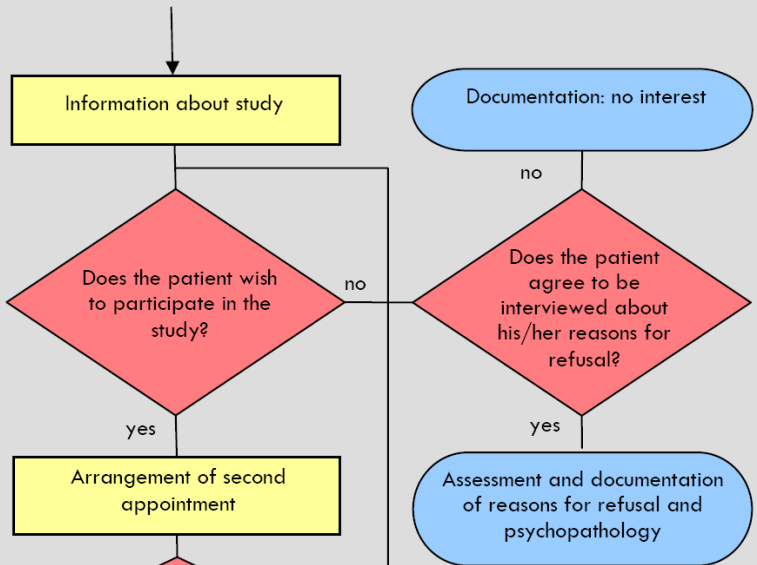

**Second  
appointment**

**Inclusion  
exami-  
nation  
T0**

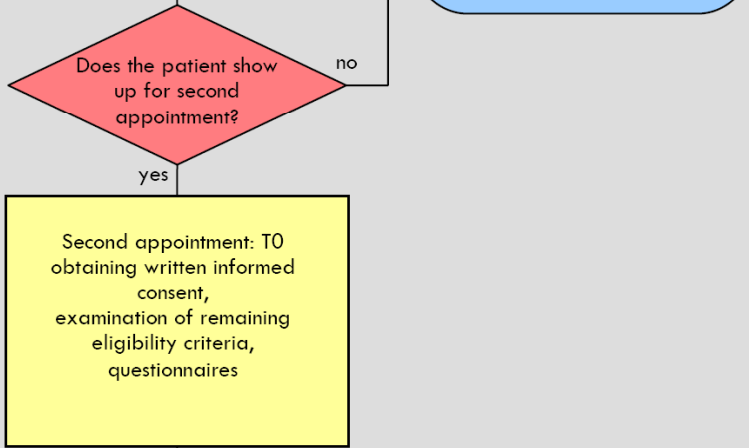

**Third  
appoint-  
ment**

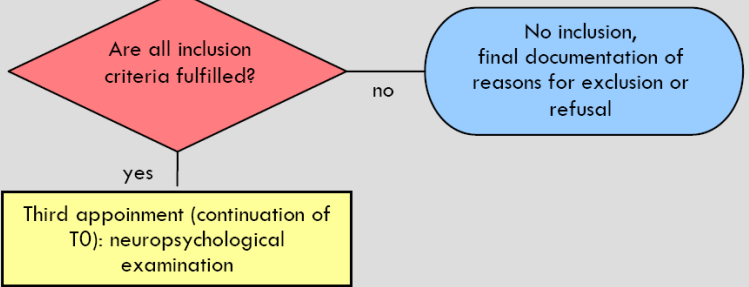

Supplement: MOESM2 [file 9618180]
